# Supplementary material for: Physical activity and sedentary behavior patterns using accelerometry from a national sample of United States adults
Source: PubMed Central journal article supplement (PMC4336769; doi:10.1186/s12966-015-0183-7), 2015-02-15
Supplement: 12966_2015_183_MOESM1_ESM.pdf [file 12966_2015_183_MOESM1_ESM.pdf]

Additional File 1: Weighted mean percents by day of week for latent classes derived from accelerometry among adults (n=7931); NHANES 2003-2006

|                                                                           | n    | Weighted Mean Percents by Day of Week |         |           |          |        |          |        |
|---------------------------------------------------------------------------|------|---------------------------------------|---------|-----------|----------|--------|----------|--------|
|                                                                           |      | Monday                                | Tuesday | Wednesday | Thursday | Friday | Saturday | Sunday |
| <u>Percent of MVPA (Troiano) out of total wearing time per day</u>        |      |                                       |         |           |          |        |          |        |
| Class 1 - Least active                                                    | 5410 | 1.3                                   | 1.2     | 1.1       | 1.2      | 1.2    | 1.2      | 1.1    |
| Class 2                                                                   | 1768 | 4.4                                   | 4.4     | 4.5       | 4.3      | 4.2    | 3.7      | 3.3    |
| Class 3                                                                   | 207  | 5.9                                   | 5.2     | 5.0       | 5.9      | 5.5    | 10.0     | 12.5   |
| Class 4                                                                   | 473  | 9.1                                   | 9.3     | 9.7       | 9.4      | 8.1    | 5.8      | 4.8    |
| Class 5 - Most active                                                     | 73   | 17.5                                  | 16.1    | 19.2      | 16.3     | 16.0   | 14.5     | 12.4   |
| <u>Percent of MVPA bouts (Troiano) out of total wearing time per day</u>  |      |                                       |         |           |          |        |          |        |
| Class 1 - Least active                                                    | 4765 | 0.0                                   | 0.0     | 0.0       | 0.0      | 0.0    | 0.0      | 0.0    |
| Class 2                                                                   | 569  | 0.0                                   | 0.0     | 0.0       | 0.0      | 0.7    | 1.2      | 1.7    |
| Class 3                                                                   | 814  | 0.7                                   | 0.7     | 1.0       | 0.6      | 0.3    | 0.2      | 0.2    |
| Class 4                                                                   | 1573 | 2.3                                   | 2.3     | 2.1       | 2.2      | 1.9    | 1.9      | 1.9    |
| Class 5 - Most active                                                     | 210  | 7.9                                   | 6.2     | 7.6       | 6.5      | 5.9    | 5.9      | 6.0    |
| <u>Percent of MVPA (Matthews) out of total wearing time per day</u>       |      |                                       |         |           |          |        |          |        |
| Class 1 - Least active                                                    | 2330 | 4.4                                   | 4.3     | 4.2       | 4.4      | 4.6    | 4.6      | 4.0    |
| Class 2                                                                   | 3277 | 11.2                                  | 10.9    | 10.8      | 10.7     | 11.0   | 11.5     | 10.8   |
| Class 3                                                                   | 1500 | 18.3                                  | 18.1    | 17.8      | 18.4     | 18.4   | 17.3     | 15.8   |
| Class 4                                                                   | 245  | 23.3                                  | 21.1    | 20.7      | 21.2     | 23.1   | 31.4     | 31.7   |
| Class 5                                                                   | 470  | 27.2                                  | 30.2    | 29.2      | 29.4     | 25.9   | 18.2     | 16.8   |
| Class 6 - Most active                                                     | 109  | 43.1                                  | 40.0    | 41.7      | 44.8     | 41.1   | 29.5     | 30.5   |
| <u>Percent of MVPA bouts (Matthews) out of total wearing time per day</u> |      |                                       |         |           |          |        |          |        |
| Class 1 - Least active                                                    | 1233 | 0.0                                   | 0.0     | 0.0       | 0.0      | 0.0    | 0.0      | 0.0    |
| Class 2                                                                   | 1410 | 0.6                                   | 0.4     | 0.5       | 0.4      | 0.5    | 1.4      | 1.5    |
| Class 3                                                                   | 2827 | 3.0                                   | 2.8     | 2.5       | 2.7      | 2.7    | 3.5      | 3.3    |
| Class 4                                                                   | 1997 | 8.7                                   | 8.0     | 8.4       | 8.1      | 8.2    | 8.6      | 7.8    |
| Class 5 - Most active                                                     | 464  | 22.4                                  | 24.8    | 22.4      | 24.8     | 22.4   | 15.0     | 13.8   |

Percent of sedentary behavior out of total wearing time per day

|                           |      |      |      |      |      |      |      |      |
|---------------------------|------|------|------|------|------|------|------|------|
| Class 1 - Most sedentary  | 662  | 82.2 | 82.2 | 82.7 | 81.6 | 82.5 | 81.5 | 83.0 |
| Class 2                   | 2090 | 69.1 | 70.3 | 70.1 | 70.4 | 69.4 | 66.7 | 68.7 |
| Class 3                   | 2848 | 58.0 | 58.3 | 58.7 | 58.6 | 58.3 | 57.7 | 59.6 |
| Class 4                   | 1749 | 46.9 | 45.7 | 46.3 | 45.4 | 45.5 | 48.2 | 51.0 |
| Class 5 - Least sedentary | 582  | 32.6 | 31.5 | 31.5 | 30.8 | 34.5 | 43.5 | 45.2 |

Percent of sedentary bouts out of total wearing time per day

|                           |      |      |      |      |      |      |      |      |
|---------------------------|------|------|------|------|------|------|------|------|
| Class 1 - Most sedentary  | 587  | 85.1 | 85.8 | 85.5 | 84.4 | 85.4 | 85.5 | 86.7 |
| Class 2                   | 1469 | 66.2 | 67.5 | 67.5 | 67.2 | 66.6 | 62.0 | 65.5 |
| Class 3                   | 656  | 50.3 | 58.1 | 60.9 | 59.7 | 46.4 | 29.5 | 37.1 |
| Class 4                   | 1449 | 49.7 | 47.9 | 46.7 | 47.3 | 50.3 | 57.9 | 58.7 |
| Class 5                   | 1951 | 35.5 | 34.1 | 36.4 | 35.7 | 35.5 | 32.7 | 39.7 |
| Class 6                   | 288  | 23.1 | 24.0 | 22.4 | 21.4 | 32.3 | 69.1 | 56.0 |
| Class 7 - Least sedentary | 1531 | 19.8 | 18.3 | 17.2 | 17.5 | 18.4 | 22.5 | 26.1 |

---

MVPA=moderate to vigorous physical activity
