# Supplementary material for: Physical activity and sedentary behavior patterns using accelerometry from a national sample of United States adults
Source: PubMed Central journal article supplement (PMC4336769; doi:10.1186/s12966-015-0183-7), 2015-02-15
Supplement: 12966_2015_183_MOESM2_ESM.pdf [file 12966_2015_183_MOESM2_ESM.pdf]

Additional File 2: Wear time by the latent classes derived from accelerometry among adults (n=7931); NHANES 2003-2006

|                                                                          | Total Wear Time (hours/day) |               |               |               |               |               |               |               |      |
|--------------------------------------------------------------------------|-----------------------------|---------------|---------------|---------------|---------------|---------------|---------------|---------------|------|
|                                                                          | Overall                     | Monday        | Tuesday       | Wednesday     | Thursday      | Friday        | Saturday      | Sunday        |      |
|                                                                          | n                           | Weighted Mean | Weighted Mean | Weighted Mean | Weighted Mean | Weighted Mean | Weighted Mean | Weighted Mean |      |
| <u>Average counts/minute</u>                                             |                             |               |               |               |               |               |               |               |      |
| Class 1 - Least active                                                   | 2088                        | 14.2          | 14.4          | 14.6          | 14.4          | 14.4          | 14.5          | 14.2          | 14.0 |
| Class 2                                                                  | 3372                        | 14.1          | 14.5          | 14.6          | 14.5          | 14.4          | 14.5          | 13.8          | 13.5 |
| Class 3                                                                  | 1596                        | 14.0          | 14.3          | 14.2          | 14.4          | 14.3          | 14.4          | 13.8          | 13.3 |
| Class 4                                                                  | 181                         | 14.2          | 14.6          | 14.6          | 14.8          | 14.8          | 14.6          | 13.5          | 13.1 |
| Class 5                                                                  | 571                         | 13.7          | 14.1          | 14.1          | 14.0          | 13.9          | 14.1          | 13.6          | 12.8 |
| Class 6 - Most active                                                    | 123                         | 13.6          | 14.0          | 14.4          | 13.7          | 13.6          | 13.7          | 13.2          | 13.2 |
| <u>Percent of MVPA (Troiano) out of total wearing time per day</u>       |                             |               |               |               |               |               |               |               |      |
| Class 1 - Least active                                                   | 5410                        | 14.1          | 14.4          | 14.4          | 14.4          | 14.3          | 14.4          | 13.9          | 13.6 |
| Class 2                                                                  | 1768                        | 14.2          | 14.5          | 14.6          | 14.6          | 14.5          | 14.6          | 13.8          | 13.4 |
| Class 3                                                                  | 207                         | 14.0          | 14.4          | 14.4          | 14.4          | 14.8          | 14.6          | 13.4          | 12.9 |
| Class 4                                                                  | 473                         | 13.8          | 14.2          | 14.1          | 14.2          | 14.0          | 14.2          | 13.7          | 13.2 |
| Class 5 - Most active                                                    | 73                          | 13.6          | 14.4          | 14.5          | 13.9          | 13.7          | 13.9          | 12.8          | 12.4 |
| <u>Percent of MVPA bouts (Troiano) out of total wearing time per day</u> |                             |               |               |               |               |               |               |               |      |
| Class 1 - Least active                                                   | 4765                        | 13.9          | 14.3          | 14.3          | 14.2          | 14.2          | 14.3          | 13.7          | 13.5 |
| Class 2                                                                  | 569                         | 14.4          | 14.4          | 14.7          | 14.7          | 14.6          | 15.0          | 14.2          | 13.5 |
| Class 3                                                                  | 814                         | 14.6          | 14.9          | 15.0          | 14.9          | 14.8          | 15.0          | 14.2          | 13.6 |
| Class 4                                                                  | 1573                        | 14.2          | 14.5          | 14.5          | 14.6          | 14.5          | 14.5          | 14.0          | 13.6 |
| Class 5 - Most active                                                    | 210                         | 13.6          | 14.0          | 13.9          | 13.9          | 13.8          | 14.0          | 13.4          | 12.8 |
| <u>Percent of MVPA (Matthews) out of total wearing time per day</u>      |                             |               |               |               |               |               |               |               |      |
| Class 1 - Least active                                                   | 2330                        | 14.1          | 14.3          | 14.5          | 14.4          | 14.3          | 14.4          | 14.1          | 13.9 |
| Class 2                                                                  | 3277                        | 14.2          | 14.5          | 14.6          | 14.6          | 14.5          | 14.6          | 13.8          | 13.5 |
| Class 3                                                                  | 1500                        | 14.0          | 14.3          | 14.2          | 14.3          | 14.2          | 14.3          | 13.7          | 13.4 |
| Class 4                                                                  | 245                         | 14.0          | 14.4          | 14.6          | 14.5          | 14.6          | 14.3          | 13.4          | 13.1 |
| Class 5                                                                  | 470                         | 13.7          | 14.1          | 14.1          | 13.9          | 14.0          | 14.2          | 13.8          | 12.7 |
| Class 6 - Most active                                                    | 109                         | 13.3          | 14.0          | 14.2          | 13.8          | 13.2          | 13.6          | 12.8          | 12.9 |

Percent of MVPA bouts (Matthews) out of total wearing time per day

|                        |      |      |      |      |      |      |      |      |      |
|------------------------|------|------|------|------|------|------|------|------|------|
| Class 1 - Least active | 1233 | 13.7 | 14.0 | 14.0 | 13.9 | 13.9 | 14.0 | 13.8 | 13.5 |
| Class 2                | 1410 | 14.2 | 14.5 | 14.7 | 14.6 | 14.4 | 14.6 | 13.9 | 13.6 |
| Class 3                | 2827 | 14.2 | 14.5 | 14.6 | 14.6 | 14.5 | 14.6 | 13.9 | 13.6 |
| Class 4                | 1997 | 14.0 | 14.4 | 14.4 | 14.5 | 14.3 | 14.4 | 13.8 | 13.4 |
| Class 5 - Most active  | 464  | 13.7 | 14.0 | 14.3 | 13.9 | 13.8 | 14.0 | 13.6 | 13.0 |

Percent of sedentary behavior out of total wearing time per day

|                           |      |      |      |      |      |      |      |      |      |
|---------------------------|------|------|------|------|------|------|------|------|------|
| Class 1 - Most sedentary  | 662  | 14.5 | 14.9 | 14.9 | 14.6 | 14.8 | 14.7 | 14.8 | 14.7 |
| Class 2                   | 2090 | 14.3 | 14.6 | 14.8 | 14.6 | 14.6 | 14.7 | 14.0 | 13.8 |
| Class 3                   | 2848 | 14.1 | 14.4 | 14.5 | 14.5 | 14.3 | 14.5 | 13.8 | 13.5 |
| Class 4                   | 1749 | 13.8 | 14.2 | 14.1 | 14.2 | 14.0 | 14.1 | 13.6 | 13.2 |
| Class 5 - Least sedentary | 582  | 13.4 | 13.8 | 13.8 | 13.7 | 13.7 | 13.9 | 13.3 | 12.5 |

Percent of sedentary bouts out of total wearing time per day

|                           |      |      |      |      |      |      |      |      |      |
|---------------------------|------|------|------|------|------|------|------|------|------|
| Class 1 - Most sedentary  | 587  | 14.5 | 14.9 | 14.8 | 14.6 | 14.8 | 14.6 | 14.8 | 14.7 |
| Class 2                   | 1469 | 14.3 | 14.5 | 14.7 | 14.6 | 14.6 | 14.7 | 14.1 | 13.8 |
| Class 3                   | 656  | 14.3 | 14.7 | 15.0 | 14.7 | 14.7 | 14.9 | 13.6 | 13.4 |
| Class 4                   | 1449 | 14.4 | 14.7 | 14.8 | 14.7 | 14.6 | 14.7 | 14.1 | 13.8 |
| Class 5                   | 1951 | 14.0 | 14.3 | 14.3 | 14.4 | 14.2 | 14.4 | 13.8 | 13.4 |
| Class 6                   | 288  | 14.0 | 14.6 | 14.2 | 14.4 | 14.1 | 14.6 | 13.5 | 13.3 |
| Class 7 - Least sedentary | 1531 | 13.5 | 13.8 | 13.8 | 13.8 | 13.8 | 13.8 | 13.3 | 12.7 |

---

MVPA=moderate to vigorous physical activity
