# Supplementary material for: Physical activity and sedentary behavior patterns using accelerometry from a national sample of United States adults
Source: PubMed Central journal article supplement (PMC4336769; doi:10.1186/s12966-015-0183-7), 2015-02-15
Supplement: 12966_2015_183_MOESM3_ESM.pdf [file 12966_2015_183_MOESM3_ESM.pdf]

Additional File 3: Data dictionary for latent classes variables based on accelerometry measures among adults (NHANES 2003-2006)

| Variable Name                              | SAS Label                                                   | SAS value                                                                                                                                                                              |
|--------------------------------------------|-------------------------------------------------------------|----------------------------------------------------------------------------------------------------------------------------------------------------------------------------------------|
| SEQN                                       | Respondent sequence number                                  |                                                                                                                                                                                        |
| ADHERENT                                   | Indicator of participant adherent status                    | Categorical:<br>0 = Did not wear accelerometer<br>1 = Wore accelerometer but not calibrated or faulty<br>2 = Wore accelerometer but not adherent<br>3 = Adherent<br>. = under 18 years |
| <b>Latent classes for CPM</b>              |                                                             |                                                                                                                                                                                        |
| LC6_CNTMIN2                                | Latent classes on CPM                                       | Categorical:<br>1 = Class 1<br>2 = Class 2<br>3 = Class 3<br>4 = Class 4<br>5 = Class 5<br>6 = Class 6                                                                                 |
| CNTMIN_PP1                                 | Posterior probability in latent class 1 -- on CPM           | Continuous                                                                                                                                                                             |
| CNTMIN_PP2                                 | Posterior probability in latent class 2 -- on CPM           | Continuous                                                                                                                                                                             |
| CNTMIN_PP3                                 | Posterior probability in latent class 3 -- on CPM           | Continuous                                                                                                                                                                             |
| CNTMIN_PP4                                 | Posterior probability in latent class 4 -- on CPM           | Continuous                                                                                                                                                                             |
| CNTMIN_PP5                                 | Posterior probability in latent class 5 -- on CPM           | Continuous                                                                                                                                                                             |
| CNTMIN_PP6                                 | Posterior probability in latent class 6 -- on CPM           | Continuous                                                                                                                                                                             |
| <b>Latent classes for % MVPA (Troiano)</b> |                                                             |                                                                                                                                                                                        |
| LC_PCT_MVTO2                               | Latent classes on % MVPA (Troiano) out of total             | Categorical:<br>1 = Class 1<br>2 = Class 2<br>3 = Class 3<br>4 = Class 4<br>5 = Class 5                                                                                                |
| PMVTO_PP1                                  | Posterior probability in latent class 1 -- % MVPA (Troiano) | Continuous                                                                                                                                                                             |
| PMVTO_PP2                                  | Posterior probability in latent class 2 -- % MVPA (Troiano) | Continuous                                                                                                                                                                             |

|                                                   |                                                                   |                                                                                                        |
|---------------------------------------------------|-------------------------------------------------------------------|--------------------------------------------------------------------------------------------------------|
| PMVTO_PP3                                         | Posterior probability in latent class 3 -- % MVPA (Troiano)       | Continuous                                                                                             |
| PMVTO_PP4                                         | Posterior probability in latent class 4 -- % MVPA (Troiano)       | Continuous                                                                                             |
| PMVTO_PP5                                         | Posterior probability in latent class 5 -- % MVPA (Troiano)       | Continuous                                                                                             |
| <b>Latent classes for % MVPA bouts (Troiano)</b>  |                                                                   |                                                                                                        |
| LC_PCT_MVBTO2                                     | Latent classes on % MVPA bouts (Troiano) out of total             | Categorical:<br>1 = Class 1<br>2 = Class 2<br>3 = Class 3<br>4 = Class 4<br>5 = Class 5                |
| PMVBTO_PP1                                        | Posterior probability in latent class 1 -- % MVPA bouts (Troiano) | Continuous                                                                                             |
| PMVBTO_PP2                                        | Posterior probability in latent class 2 -- % MVPA bouts (Troiano) | Continuous                                                                                             |
| PMVBTO_PP3                                        | Posterior probability in latent class 3 -- % MVPA bouts (Troiano) | Continuous                                                                                             |
| PMVBTO_PP4                                        | Posterior probability in latent class 4 -- % MVPA bouts (Troiano) | Continuous                                                                                             |
| PMVBTO_PP5                                        | Posterior probability in latent class 5 -- % MVPA bouts (Troiano) | Continuous                                                                                             |
| <b>Latent classes for % MVPA (Matthews)</b>       |                                                                   |                                                                                                        |
| LC6_PCT_MVCM2                                     | Latent classes on % MVPA (Matthews) out of total                  | Categorical:<br>1 = Class 1<br>2 = Class 2<br>3 = Class 3<br>4 = Class 4<br>5 = Class 5<br>6 = Class 6 |
| PMVCM_PP1                                         | Posterior probability in latent class 1 -- % MVPA (Matthews)      | Continuous                                                                                             |
| PMVCM_PP2                                         | Posterior probability in latent class 2 -- % MVPA (Matthews)      | Continuous                                                                                             |
| PMVCM_PP3                                         | Posterior probability in latent class 3 -- % MVPA (Matthews)      | Continuous                                                                                             |
| PMVCM_PP4                                         | Posterior probability in latent class 4 -- % MVPA (Matthews)      | Continuous                                                                                             |
| PMVCM_PP5                                         | Posterior probability in latent class 5 -- % MVPA (Matthews)      | Continuous                                                                                             |
| PMVCM_PP6                                         | Posterior probability in latent class 6 -- % MVPA (Matthews)      | Continuous                                                                                             |
| <b>Latent classes for % MVPA bouts (Matthews)</b> |                                                                   |                                                                                                        |

|                                             |                                                                    |                                                                                                                       |
|---------------------------------------------|--------------------------------------------------------------------|-----------------------------------------------------------------------------------------------------------------------|
| LC6_PCT_MVBCM2                              | Latent classes on % MVPA bouts (Matthews) out of total             | Categorical:<br>1 = Class 1<br>2 = Class 2<br>3 = Class 3<br>4 = Class 4<br>5 = Class 5                               |
| PMVBCM_PP1                                  | Posterior probability in latent class 1 -- % MVPA bouts (Matthews) | Continuous                                                                                                            |
| PMVBCM_PP2                                  | Posterior probability in latent class 2 -- % MVPA bouts (Matthews) | Continuous                                                                                                            |
| PMVBCM_PP3                                  | Posterior probability in latent class 3 -- % MVPA bouts (Matthews) | Continuous                                                                                                            |
| PMVBCM_PP4                                  | Posterior probability in latent class 4 -- % MVPA bouts (Matthews) | Continuous                                                                                                            |
| PMVBCM_PP5                                  | Posterior probability in latent class 5 -- % MVPA bouts (Matthews) | Continuous                                                                                                            |
| <b>Latent classes for % sedentary</b>       |                                                                    |                                                                                                                       |
| LC_PCT_SD2                                  | Latent classes on % sedentary out of total                         | Categorical:<br>1 = Class 1<br>2 = Class 2<br>3 = Class 3<br>4 = Class 4<br>5 = Class 5                               |
| PSD_PP1                                     | Posterior probability in latent class 1 -- % Sedentary             | Continuous                                                                                                            |
| PSD_PP2                                     | Posterior probability in latent class 2 -- % Sedentary             | Continuous                                                                                                            |
| PSD_PP3                                     | Posterior probability in latent class 3 -- % Sedentary             | Continuous                                                                                                            |
| PSD_PP4                                     | Posterior probability in latent class 4 -- % Sedentary             | Continuous                                                                                                            |
| PSD_PP5                                     | Posterior probability in latent class 5 -- % Sedentary             | Continuous                                                                                                            |
| <b>Latent classes for % sedentary bouts</b> |                                                                    |                                                                                                                       |
| LC7_PCT_SDB2                                | Latent classes on % sedentary bouts out of total                   | Categorical:<br>1 = Class 1<br>2 = Class 2<br>3 = Class 3<br>4 = Class 4<br>5 = Class 5<br>6 = Class 6<br>7 = Class 7 |
| PSDB_PP1                                    | Posterior probability in latent class 1 -- % Sedentary bouts       | Continuous                                                                                                            |
| PSDB_PP2                                    | Posterior probability in latent class 2 -- % Sedentary bouts       | Continuous                                                                                                            |

|          |                                                              |            |
|----------|--------------------------------------------------------------|------------|
| PSDB_PP3 | Posterior probability in latent class 3 -- % Sedentary bouts | Continuous |
| PSDB_PP4 | Posterior probability in latent class 4 -- % Sedentary bouts | Continuous |
| PSDB_PP5 | Posterior probability in latent class 5 -- % Sedentary bouts | Continuous |
| PSDB_PP6 | Posterior probability in latent class 6 -- % Sedentary bouts | Continuous |
| PSDB_PP7 | Posterior probability in latent class 7 -- % Sedentary bouts | Continuous |

CPM=counts per minute; MVPA=moderate to vigorous physical activity
